# Supplementary material for: Propagation of a De Novo Gene under Natural Selection: Antifreeze Glycoprotein Genes and Their Evolutionary History in Codfishes
Source: MDPI journal article supplement (doi:10.3390/genes12111777), 2021-11-09
Supplement: s1 [file s1]

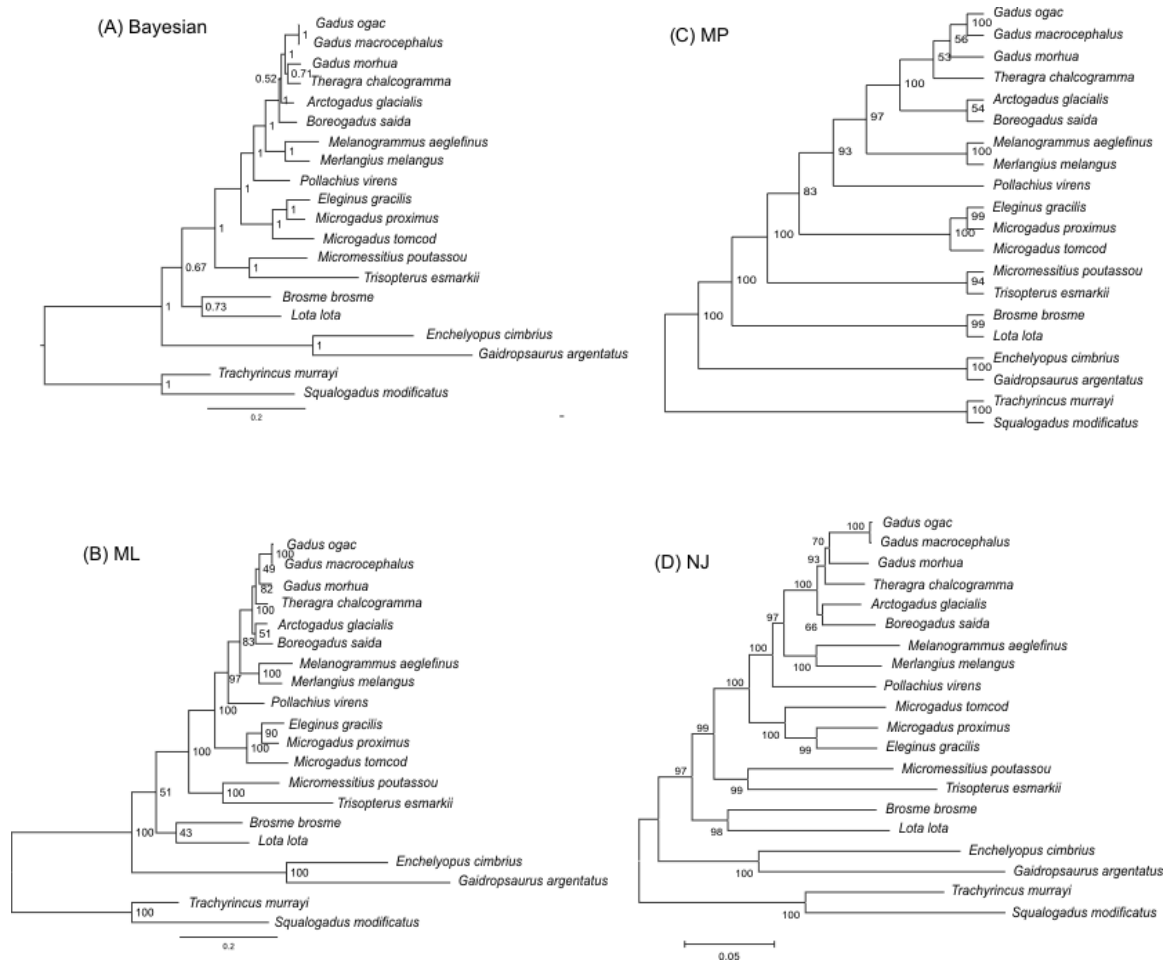

**Figure S1** Gadid phylogenetic trees obtained by (A) Bayesian analysis, (B) Maximum Likelihood (ML) analysis, (C) Maximum Parsimony (MP) analysis, and (D) Neighbor – Joining (NJ) analysis of 18 gadid species using complete mitochondrial COI and ND2 gene sequences, and rooted with two gadiform species from family Macrouridae, *Squalogadus modificatus* and *Trachyrincus murrayi*. Numbers at branch nodes indicate the posterior probabilities on Bayesian tree, and the percentage support values (%) from 1000 bootstrap replications of ML, MP and NJ analyses on their respective tree.

**Table S 1 Species and month and locality of sample collection\*, and GenBank Accession numbers for COI sequences.**

| Subfamily<br>Species            | Collected<br>season | Sampling locality                | GenBank Accession<br>numbers (COI) |
|---------------------------------|---------------------|----------------------------------|------------------------------------|
| <b>Gadinae</b>                  |                     |                                  |                                    |
| <i>Arctogadus glacialis</i>     | July                | Uummannaq, W. Greenland          | MK011286                           |
| <i>Boreogadus saida</i>         | October             | Spitzbergen                      | MK011278                           |
| <i>Eleginus gracilis</i>        | March               | Kotzebue, AK                     | MK011279                           |
| <i>Gadus macrocephalus</i>      | March/August        | Bogosloff Isld/Cook Inlet, AK    | MK011275                           |
| <i>Gadus morhua</i> **          | August              | Copenhagen Harbor                | MK011280                           |
| <i>Gadus ogac</i> **            | March/August        | Labrador/Disco Bay, W. Greenland | MK011287                           |
| <i>Melanogrammus aeglefinus</i> | April               | Tromsø fjord, Norway             | MK011282                           |
| <i>Merlangius merlangus</i>     | April               | Tromsø fjord, Norway             | MK011283                           |
| <i>Microgadus proximus</i>      | August              | Cook Inlet, AK                   | MK011274                           |
| <i>Microgadus tomcod</i>        | January             | Shinnecock Bay, NY               | MK011276                           |
| <i>Micromesistius poutassou</i> | April               | Tromsø fjord, Norway             | MK011288                           |
| <i>Pollachius virens</i>        | April               | Tromsø fjord, Norway             | MK011284                           |
| <i>Theragra chalcogramma</i>    | March               | South Bering Sea                 | MK011277                           |
| <i>Trisopterus esmarkii</i>     | April               | Tromsø fjord, Norway             | MK011285                           |
| <b>Lotinae</b>                  |                     |                                  |                                    |
| <i>Brosme brosme</i>            | September           | Tromsø fjord, Norway             | MK011273                           |
| <i>Lota lota</i>                | April               | Oneida Lake, New York            | MK011281                           |
| <b>Gaidropsarinae</b>           |                     |                                  |                                    |
| <i>Enchelyopus cimbrius</i>     | April               | Finnmarch, Norway                | MK011289                           |
| <i>Gaidropsarus argentatus</i>  | October             | Scoresbysund, East Greenland     | MK011290                           |

\*Tissues and blood were collected from each species.

\*\*Summer (August) *Gadus morhua* and *Gadus ogac* specimens exhibit low levels of antifreeze activity. For AFGP purification, early spring serum sample of *G. ogac* (Labrador coast) from our lab inventory was used. No winter serum samples were available for *G. morhua*.

**Table S2**      **Characteristics of all AFGP genes and pseudogenes in three gadids**

| AFGP gene or pseudogene | CDS Length (bp) | Signal peptide | C-terminus non-tripeptide residues | Numbers of polyprotein cleavage sites |   |      |
|-------------------------|-----------------|----------------|------------------------------------|---------------------------------------|---|------|
|                         |                 |                |                                    | R                                     | K | RAAR |
| Bs AFGP1ψ               | ~1.7k           | Yes            | RVCVCVCV*                          | 4                                     | 2 | 0    |
| Bs AFGP2                | 766             | Yes            | AAVL*                              | 3                                     | 0 | 0    |
| Bs AFGP3                | 603             | Yes            | AAVL*                              | 1                                     | 1 | 0    |
| Bs AFGP4                | 1791            | Yes            | AAVF*                              | 2                                     | 4 | 0    |
| Bs AFGP5                | ~2k             | Yes            | AAVF*                              | 0                                     | 4 | 0    |
| Bs AFGP6ψ               | ~800            | No             | AAVF*                              | 1                                     | 3 | 0    |
| Bs AFGP7ψ               | 959             | Yes            | AAVS*                              | 1                                     | 3 | 0    |
| Bs AFGP8                | 2256            | Yes            | AVF*                               | 5                                     | 0 | 9    |
| Bs AFGP9                | 2085            | Yes            | AVF*                               | 2                                     | 0 | 9    |
| Bs AFGP10               | ~2.7k           | Yes            | AVF*                               | 1                                     | 0 | 5    |
| Bs AFGP11               | 1254            | Yes            | AVF*                               | 5                                     | 0 | 4    |
| Bs AFGP12               | 1737            | Yes            | AVF*                               | 5                                     | 0 | 7    |
| Bs AFGP13               | 2052            | Yes            | AVF*                               | 5                                     | 0 | 8    |
| Bs AFGP14ψ              | 1288            | No             | AVF*                               | 5                                     | 0 | 4    |
| Bs AFGP15               | 1563            | Yes            | AVF*                               | 6                                     | 0 | 5    |
| Bs AFGP16               | ~1.2k           | Yes            | in gap                             | 1                                     | 0 | 1    |
| Gm AFGP1ψ               | ~2.6k           | Yes            | RVCVCVCV*                          | 4                                     | 2 | 0    |
| Gm AFGP2                | 529             | Yes            | AAVL*                              | 2                                     | 1 | 0    |
| Gm AFGP3                | 595             | Yes            | AAVL*                              | 1                                     | 0 | 0    |
| Gm AFGP4                | 637             | Yes            | AAVL*                              | 1                                     | 1 | 0    |
| Gm AFGP5                | 1566            | Yes            | AAVL*                              | 4                                     | 0 | 0    |
| Gm AFGP6                | ~2.8k           | Yes            | AAVF*                              | 0                                     | 8 | 0    |
| Gm AFGP7ψ               | 698             | Yes            | AAVS*                              | 0                                     | 0 | 0    |
| Mt AFGP1                | 796             | Yes            | AVF*                               | 0                                     | 1 | 0    |
| Mt AFGP2                | ~2.2k           | Yes            | AAVF*                              | 0                                     | 1 | 0    |
| Mt AFGP3                | ~4.5k           | Yes            | KL*                                | 0                                     | 0 | 50   |
| Mt AFGP4ψ               | 723             | No             | AAVS*                              | 1                                     | 0 | 0    |

Notes: CDS, coding sequence. Pseudogenes are denoted by 'ψ' at the end of the gene name. The lengths of the complete genes are accurate to base pair (bp), and the estimated lengths of the incomplete genes (have gap in assembly) are indicated by ~. The symbol '\*' in the column 'C-terminus non-tripeptide residues' indicates the stop codon. Amino acid is represented by single letter. The numbers in the last three columns represent the copy number of each type of polyprotein cleavage sites.

**Table S3 . Comparison of amino acid (%) in mature AFGPs and AFGP gene (conceptual translation) in *B. saida***

|                  | Size<br>isoforms | Thr  | Pro  | Ala  | Arg | Lys |
|------------------|------------------|------|------|------|-----|-----|
| Mature<br>AFGPs* | AFGP1-5          | 29.8 | 1.2  | 67.0 | 1.2 | 0   |
|                  | AFGP6            | 26.1 | 12.3 | 61.0 | 0.6 | 0   |
|                  | AFGP7,8          | 26.6 | 14.1 | 58.6 | 0.7 | 0   |
| AFGP genes       |                  | 30.0 | 10.1 | 56.6 | 3.0 | 0.3 |

\*Amino acid composition of mature AFGPs based on Chen et al 1997 {Chen, 1997b #41}.

**Table S4 Codon usage frequencies of three residue positions in the tripeptide repeats of all AFGPs in three gadids**

|                   | Tripeptide 1 <sup>st</sup> residue (%) |             |             |            |             |            |            | Tripeptide 2 <sup>nd</sup> residue (%) |            |             |             |             |            |             | Tripeptide 3 <sup>rd</sup> residue (%) |            |             |            |
|-------------------|----------------------------------------|-------------|-------------|------------|-------------|------------|------------|----------------------------------------|------------|-------------|-------------|-------------|------------|-------------|----------------------------------------|------------|-------------|------------|
|                   | Thr<br>ACA                             | Thr<br>ACT  | Thr<br>ACC  | Thr<br>ACG | Arg<br>AGA  | Lys<br>AAA | Ala<br>GCT | Ala<br>GCA                             | Ala<br>GCT | Ala<br>GCC  | Ala<br>GCG  | Pro<br>CCA  | Pro<br>CCT | Pro<br>CCG  | Ala<br>GCA                             | Ala<br>GCT | Ala<br>GCC  | Ala<br>GCG |
| Bs_AFGP2          | 39.6                                   | 25.0        | 31.3        | 0.0        | 4.2         | 0.0        | 0.0        | 16.7                                   | 0.0        | 56.3        | 12.5        | 8.3         | 0.0        | 6.3         | 14.6                                   | 2.1        | 81.3        | 2.1        |
| Bs_AFGP3          | 32.3                                   | 41.9        | 19.4        | 0.0        | 3.2         | 3.2        | 0.0        | 39.3                                   | 0.0        | 7.1         | 21.4        | 17.9        | 0.0        | 14.3        | 17.2                                   | 0.0        | 82.8        | 0.0        |
| Bs_AFGP4          | 51.2                                   | 27.7        | 15.1        | 0.6        | 1.2         | 2.4        | 1.8        | 32.5                                   | 0.6        | 31.3        | 27.1        | 4.8         | 0.0        | 3.6         | 20.5                                   | 4.2        | 75.3        | 0.0        |
| Bs_AFGP5          | 31.3                                   | 46.9        | 0.0         | 0.0        | 0.0         | 9.4        | 12.5       | 45.5                                   | 0.0        | 3.0         | 0.0         | 48.5        | 3.0        | 0.0         | 28.1                                   | 0.0        | 71.9        | 0.0        |
| Bs_AFGP6          | 22.9                                   | 54.3        | 2.9         | 0.0        | 2.9         | 8.6        | 8.6        | 47.2                                   | 0.0        | 0.0         | 0.0         | 52.8        | 0.0        | 0.0         | 25.7                                   | 2.9        | 71.4        | 0.0        |
| Bs_AFGP8          | 40.7                                   | 40.7        | 4.2         | 0.0        | 13.6        | 0.0        | 0.9        | 39.0                                   | 0.0        | 10.3        | 22.1        | 11.7        | 0.0        | 16.9        | 48.6                                   | 9.5        | 41.9        | 0.0        |
| Bs_AFGP9          | 45.6                                   | 39.0        | 4.6         | 0.0        | 9.7         | 0.0        | 1.0        | 41.2                                   | 0.0        | 13.4        | 22.2        | 10.8        | 0.0        | 12.4        | 41.5                                   | 10.4       | 48.2        | 0.0        |
| Bs_AFGP10         | 45.2                                   | 38.5        | 4.8         | 0.0        | 10.6        | 0.0        | 1.0        | 39.0                                   | 0.0        | 15.2        | 21.0        | 11.4        | 0.0        | 13.3        | 41.7                                   | 11.5       | 46.9        | 0.0        |
| Bs_AFGP11         | 36.4                                   | 44.4        | 5.1         | 0.0        | 13.1        | 0.0        | 1.0        | 30.6                                   | 0.0        | 14.3        | 22.4        | 18.4        | 0.0        | 14.3        | 57.3                                   | 5.2        | 37.5        | 0.0        |
| Bs_AFGP12         | 41.7                                   | 42.3        | 3.2         | 0.6        | 12.2        | 0.0        | 0.0        | 35.5                                   | 0.0        | 9.2         | 23.7        | 15.8        | 0.0        | 15.8        | 48.7                                   | 11.3       | 40.0        | 0.0        |
| Bs_AFGP13         | 42.4                                   | 40.0        | 4.0         | 0.0        | 12.8        | 0.8        | 0.0        | 38.7                                   | 0.0        | 8.9         | 21.8        | 13.7        | 0.0        | 16.9        | 40.8                                   | 12.0       | 47.2        | 0.0        |
| Bs_AFGP14         | 39.2                                   | 40.8        | 7.5         | 0.0        | 10.0        | 0.8        | 1.7        | 38.7                                   | 0.8        | 13.4        | 16.8        | 13.4        | 1.7        | 15.1        | 44.2                                   | 7.5        | 47.5        | 0.8        |
| Bs_AFGP15         | 37.5                                   | 41.2        | 7.4         | 0.0        | 11.0        | 1.5        | 1.5        | 40.6                                   | 0.0        | 13.3        | 17.2        | 10.2        | 1.6        | 17.2        | 41.4                                   | 10.5       | 48.1        | 0.0        |
| Bs_AFGP16         | 48.6                                   | 37.8        | 5.4         | 0.0        | 5.4         | 2.7        | 0.0        | 33.3                                   | 0.0        | 8.3         | 33.3        | 16.7        | 0.0        | 8.3         | 45.9                                   | 13.5       | 40.5        | 0.0        |
| <b>Bs Average</b> | <b>39.6</b>                            | <b>40.0</b> | <b>8.2</b>  | <b>0.1</b> | <b>7.8</b>  | <b>2.1</b> | <b>2.1</b> | <b>37.0</b>                            | <b>0.1</b> | <b>14.6</b> | <b>18.7</b> | <b>18.2</b> | <b>0.4</b> | <b>11.0</b> | <b>36.9</b>                            | <b>7.2</b> | <b>55.7</b> | <b>0.2</b> |
| Gm_AFGP2          | 42.9                                   | 28.6        | 9.5         | 0.0        | 9.5         | 4.8        | 4.8        | 30.0                                   | 5.0        | 25.0        | 15.0        | 20.0        | 0.0        | 5.0         | 19.0                                   | 0.0        | 81.0        | 0.0        |
| Gm_AFGP3          | 40.0                                   | 26.7        | 30.0        | 0.0        | 3.3         | 0.0        | 0.0        | 36.7                                   | 3.3        | 30.0        | 16.7        | 6.7         | 3.3        | 3.3         | 20.0                                   | 0.0        | 80.0        | 0.0        |
| Gm_AFGP4          | 37.5                                   | 34.4        | 21.9        | 0.0        | 3.1         | 3.1        | 0.0        | 30.0                                   | 0.0        | 23.3        | 20.0        | 16.7        | 0.0        | 10.0        | 16.1                                   | 0.0        | 80.6        | 3.2        |
| Gm_AFGP5          | 44.9                                   | 31.9        | 18.1        | 0.0        | 2.9         | 0.0        | 2.2        | 25.4                                   | 1.4        | 35.5        | 24.6        | 5.1         | 0.0        | 8.0         | 21.7                                   | 0.0        | 78.3        | 0.0        |
| Gm_AFGP6          | 29.9                                   | 48.9        | 1.5         | 0.7        | 0.0         | 5.8        | 13.1       | 49.3                                   | 0.0        | 0.7         | 0.0         | 49.3        | 0.7        | 0.0         | 28.8                                   | 5.5        | 64.4        | 1.4        |
| <b>Gm Average</b> | <b>38.6</b>                            | <b>36.7</b> | <b>13.5</b> | <b>0.1</b> | <b>3.1</b>  | <b>4.6</b> | <b>3.3</b> | <b>37.6</b>                            | <b>1.6</b> | <b>19.1</b> | <b>12.7</b> | <b>23.9</b> | <b>0.7</b> | <b>4.4</b>  | <b>22.0</b>                            | <b>1.6</b> | <b>74.2</b> | <b>2.2</b> |
| Mt_AFGP1          | 36.9                                   | 31.3        | 29.5        | 0.0        | 0.0         | 1.8        | 0.6        | 16.4                                   | 1.8        | 0.0         | 71.0        | 7.3         | 0.0        | 3.6         | 23.6                                   | 0.0        | 63.7        | 12.7       |
| Mt_AFGP2          | 32.3                                   | 41.3        | 24.6        | 0.6        | 0.0         | 0.6        | 0.6        | 32.7                                   | 0.0        | 0.0         | 57.1        | 10.2        | 0.0        | 0.0         | 13.1                                   | 1.3        | 79.1        | 6.6        |
| Mt_AFGP3          | 26.8                                   | 40.0        | 1.0         | 0.0        | 32.2        | 0.0        | 0.0        | 61.8                                   | 8.7        | 0.0         | 0.0         | 27.6        | 1.9        | 0.0         | 47.8                                   | 7.7        | 42.0        | 2.4        |
| <b>Mt Average</b> | <b>32.0</b>                            | <b>37.5</b> | <b>18.3</b> | <b>0.2</b> | <b>10.7</b> | <b>0.8</b> | <b>0.4</b> | <b>36.9</b>                            | <b>3.5</b> | <b>0.0</b>  | <b>42.7</b> | <b>15.0</b> | <b>0.6</b> | <b>1.2</b>  | <b>28.2</b>                            | <b>3.0</b> | <b>61.6</b> | <b>7.2</b> |
